# Supplementary material for: Classification of the treble clef zinc finger: noteworthy lessons for structure and function evolution
Source: PubMed Central journal article supplement (PMC4999995; doi:10.1038/srep32070), 2016-08-26

1 **Title:**

2 **Classification of the treble clef zinc finger: noteworthy lessons for structure and function**  
3 **evolution**

4  
5 **Authors:**

6 Gurmeet Kaur, Srikrishna Subramanian<sup>1</sup>

7  
8 **Contact Information**

9 CSIR-Institute of Microbial Technology (IMTECH), Sector 39-A, Chandigarh, 160036, India. Phone:  
10 +911726665483; Fax: +91-1722695215; Email: krishna@imtech.res.in

11 <sup>1</sup> Corresponding author

12  
13  
14 **Supplementary Figures.**

15 **Figure S1. Structural variations of the treble clef fold.** The observed structural variations to the  
16 core TC fold are shown using the ribbon diagrams for the respective domains. Colouring scheme: as  
17 in Fig. 1, mercury: gray. Large insertions in the core and disordered regions in the structures are  
18 represented by dotted lines.

19  
20 **Figure S2: Insertions and extensions to the core of the treble clef zinc finger fold.** Colouring  
21 scheme and representation: as in Fig. 1. The additional  $\alpha$ -helix and  $\beta$ -strands of the FYVE are  
22 coloured in a lighter tint.  $3_{10}$ -helices are represented as rectangles with serrated edges. Additional  
23 loops regions between the knuckles are shown as loop-like protrusions. The SSEs in brackets ('[ ]')  
24 are not conserved in all the structurally characterised members.

25  
26 **Figure S3: Topology diagrams of treble clef domains.** SSEs of the TC are coloured and  
27 represented as in Fig. 1.  $\beta$ -strands that are placed closely are involved in hydrogen bonding and form  
28  $\beta$ -hairpins/ $\beta$ -sheets. In some proteins such as RPB10, hypothetical protein ORF126, prolyl-RS, etc.,  
29 few SSEs are boxed in different colours because their topological connections are such that they could  
30 be independently structurally-related to other protein folds (as mentioned in the figure), but, none-the-  
31 less the overall zinc-binding site resembles a TC motif. In MerB (PDBid 3F0P\_A1) and ZF of E6  
32 oncoprotein TC2 (PDBid 4GIZ\_C), the knuckle- $\beta$ -hairpin forms a  $\beta$ -sheet by hydrogen bonding with  
33 the primary  $\beta$ -hairpin and for these, the  $\alpha$ -helix is shown behind the plane of the  $\beta$ -sheet.

**FIGURE S1**

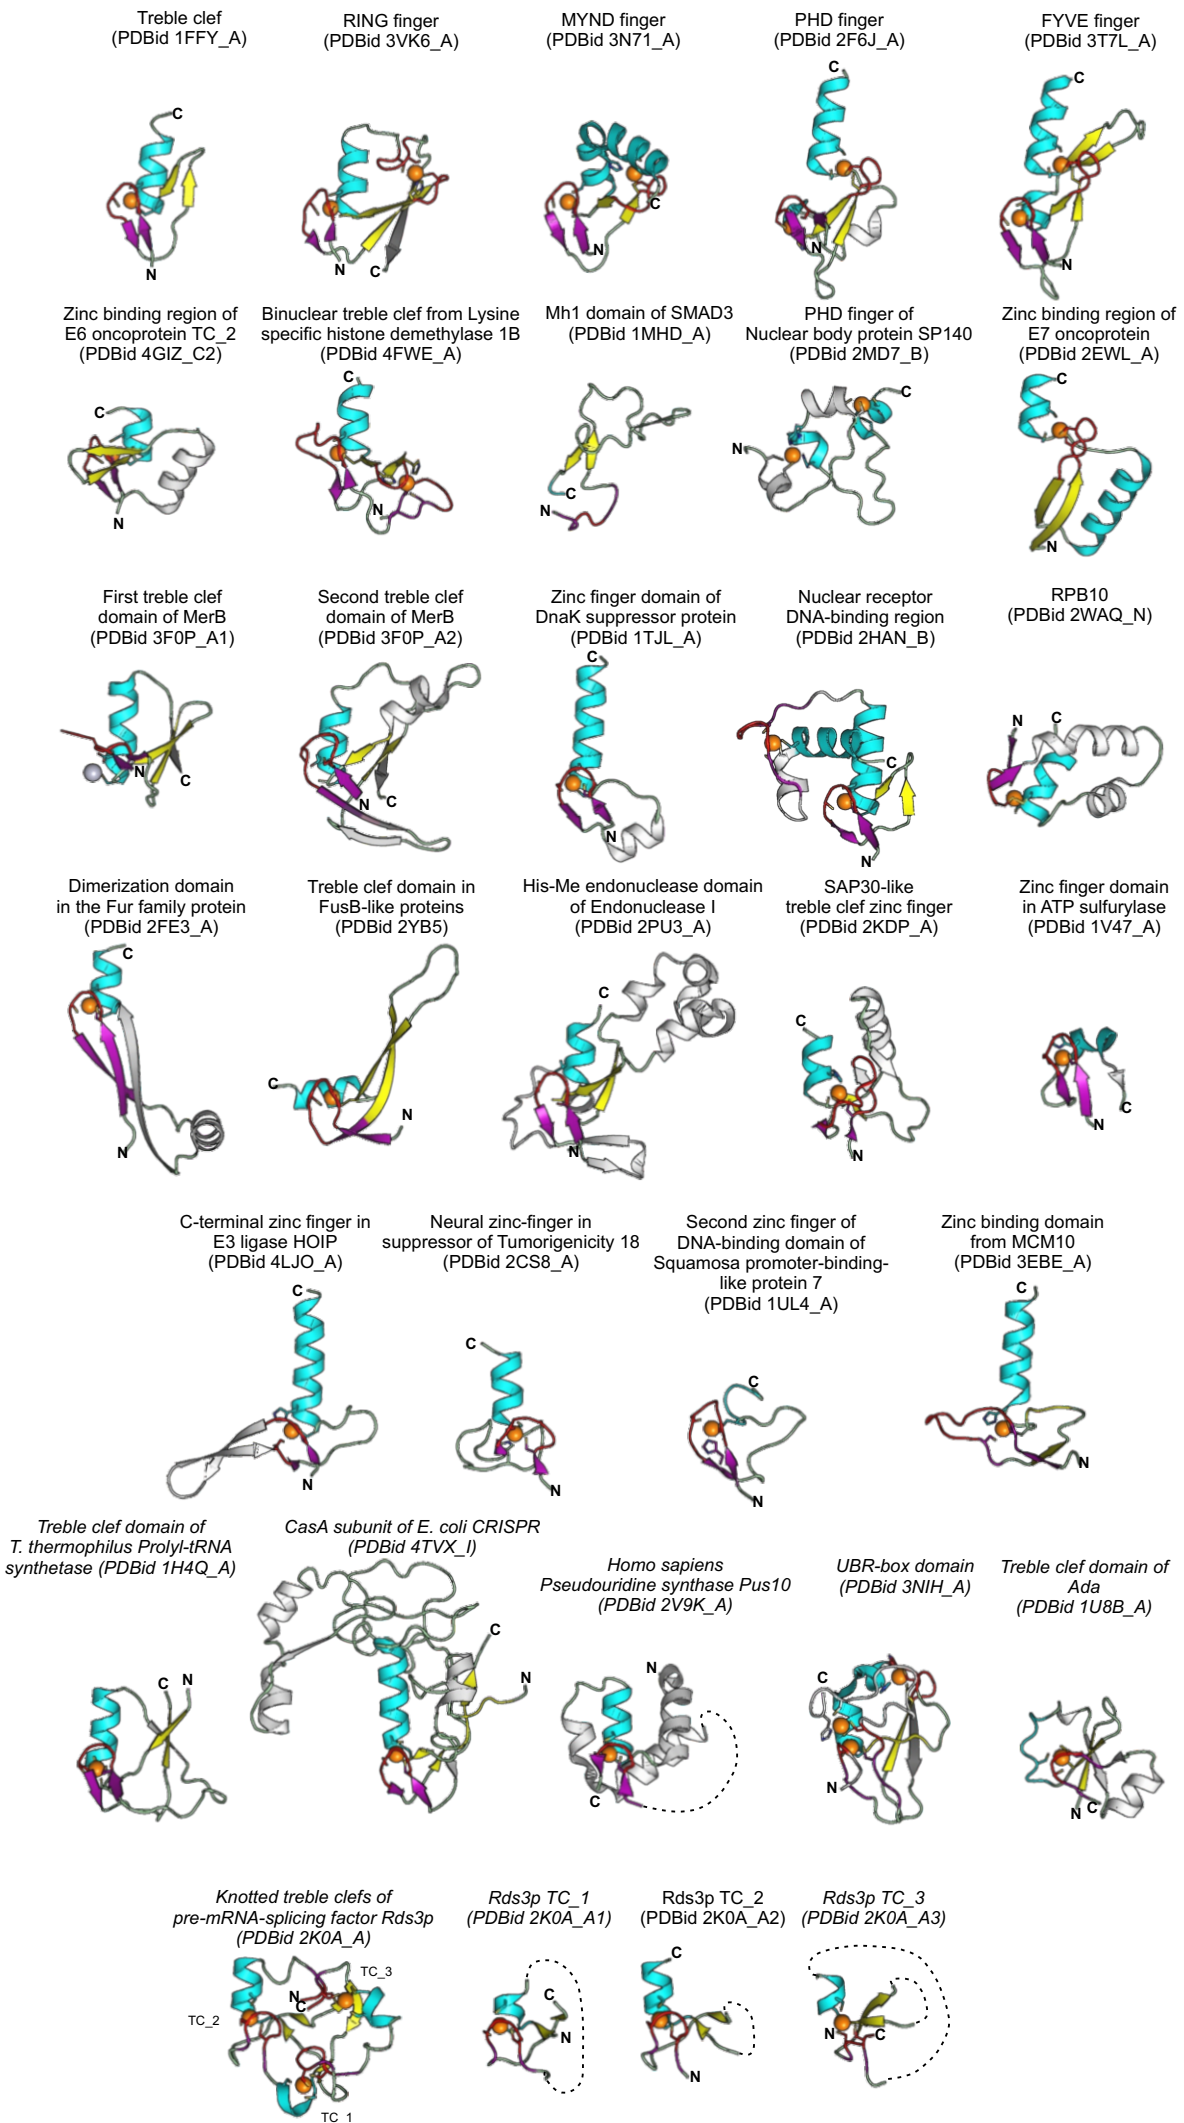

FIGURE S2

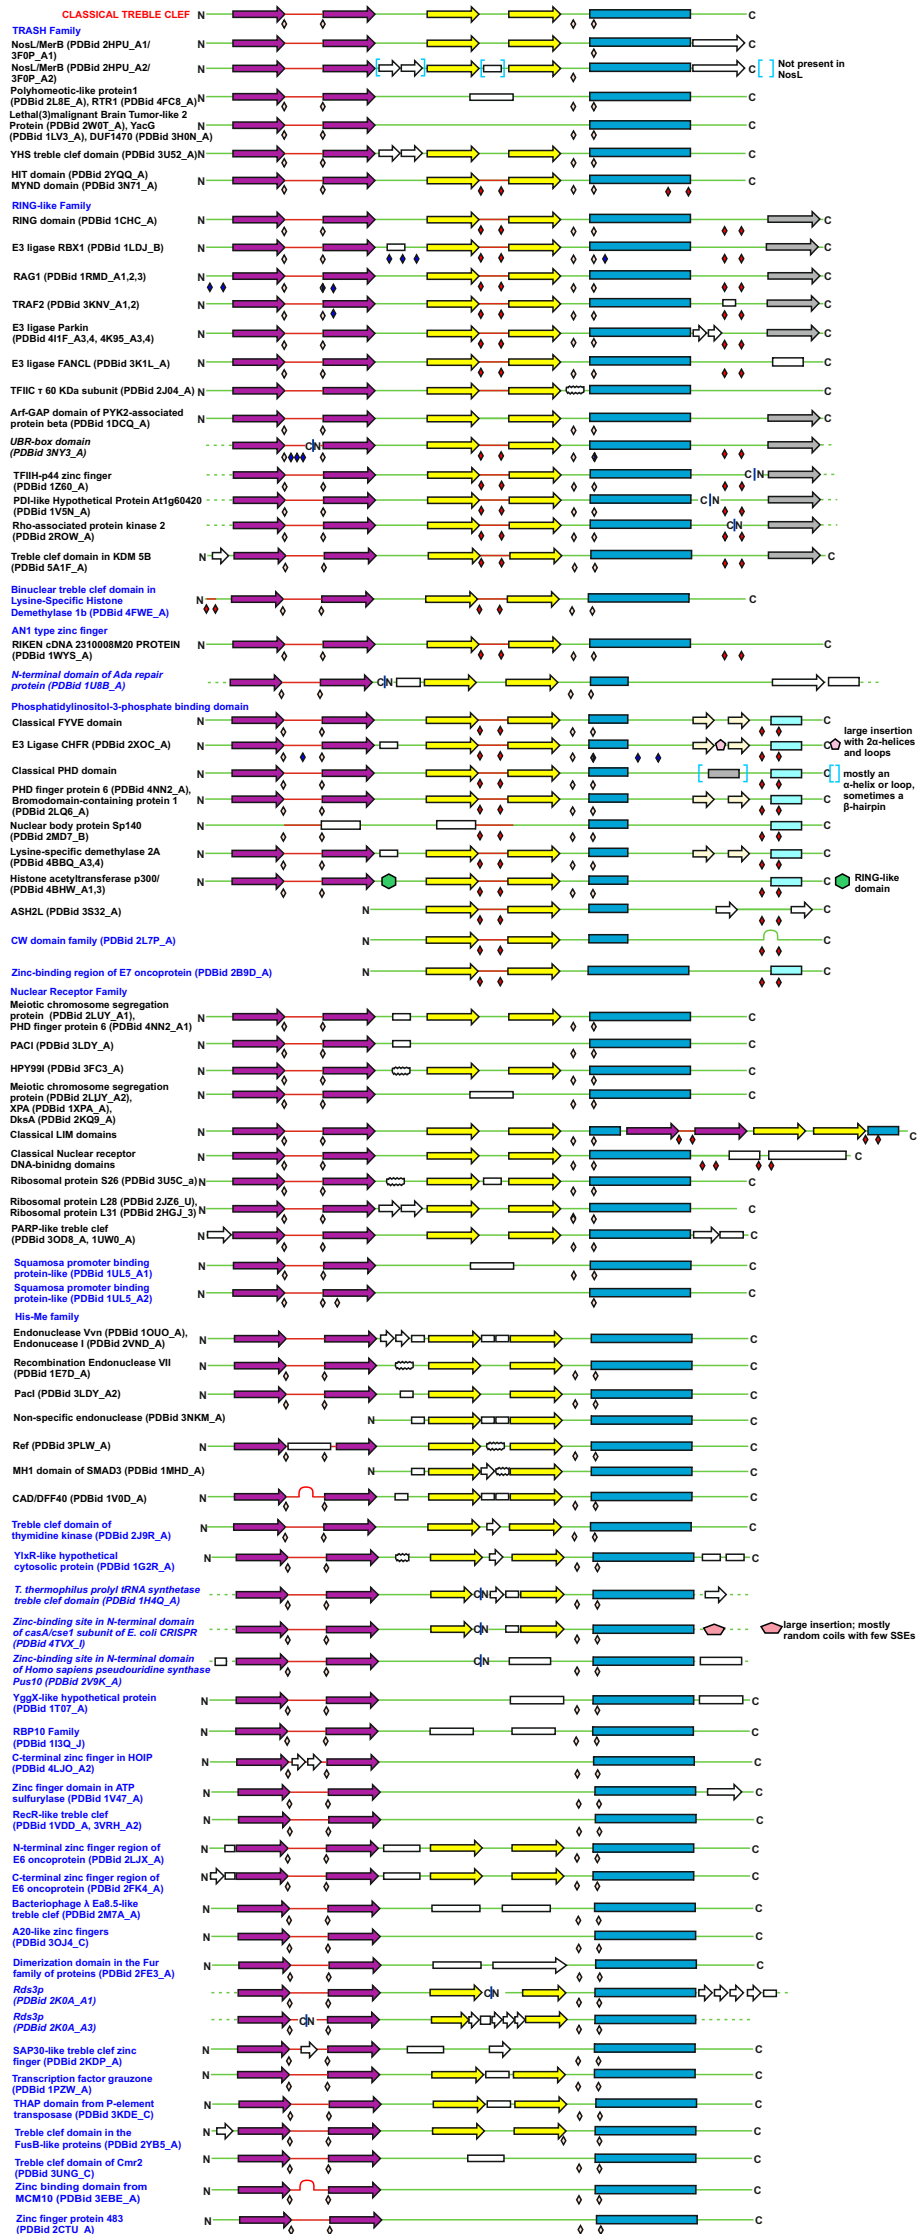

FIGURE S3

GENERAL TOPOLOGIES

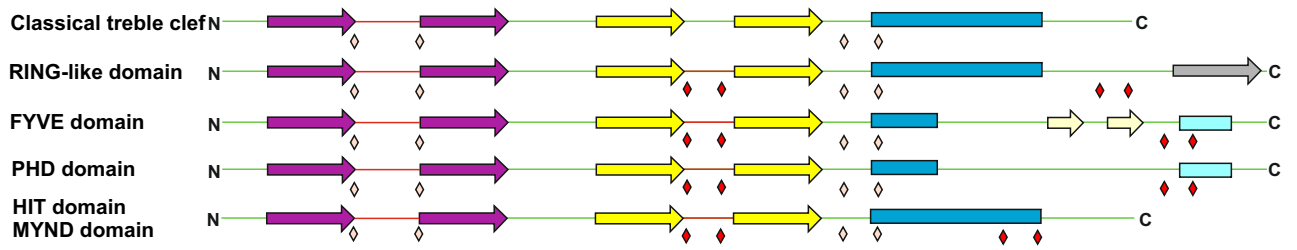

Ribosomal protein L24 (PDBid 3U5E\_W)

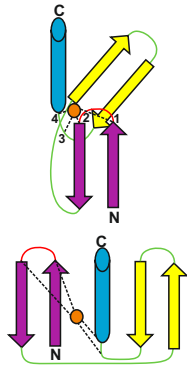

RING-like domain (PDBid 1CHC\_A)

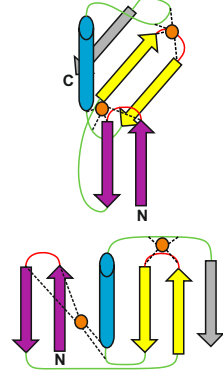

HIT domain (PDBid 2YQQ\_A)  
MYND domain (PDBid 3N71\_A)

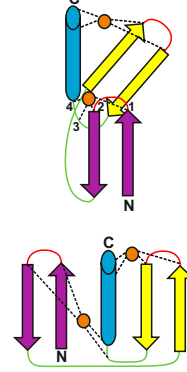

FYVE domain (PDBid 1VFY\_A)

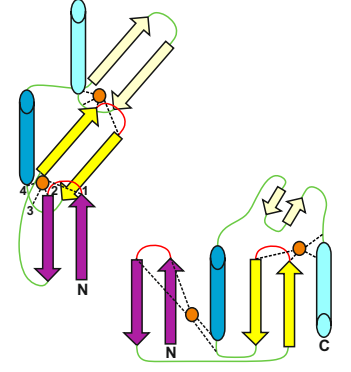

SPECIFIC VARIATIONS OBSERVED

E3 ligase RBX1 (PDBid 1LDJ\_B)

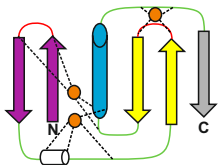

RAG1 (PDBid 1RMD\_A1,2,3)

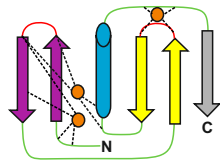

UBR-box domain (PDBid 3NY3\_A)

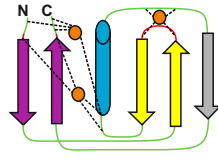

C1 domain of Rho-associated protein kinase 2 (PDBid 2ROW\_A)  
PDI-like Hypothetical Protein At1g60420 (PDBid 1V5N\_A)

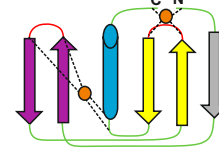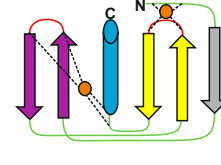

Lysine-specific demethylase 2A (PDBid 4BBQ\_A3,4)

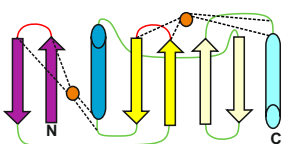

ASH2L (PDBid 3S32\_A; N-terminal first zinc-binding site deteriorated in structure)

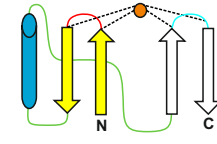

CW domain (PDBid 2L7P\_A)

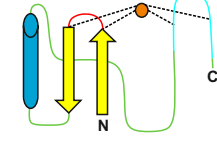

Zinc-binding region of E7 oncoprotein (PDBid 2EWL\_A)

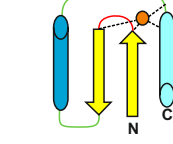

Treble clef of thymidine kinase (PDBid 2J9R\_A)

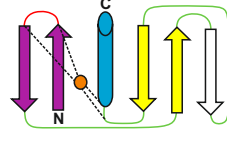

YHS domain (PDBid 3U52\_A)

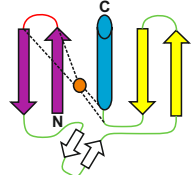

Treble clef in KDM 5B (PDBid 5A1F\_A)

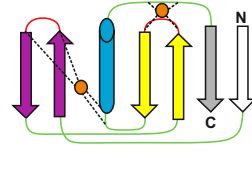

Treble clef in FusB-like proteins (PDBid 2YB5)

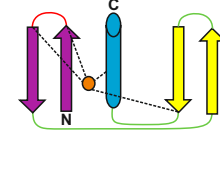

MerB (PDBid 3F0P\_A1)

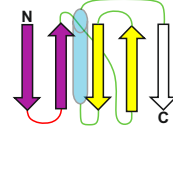

MerB (PDBid 3F0P\_A2)

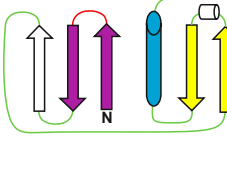

Binuclear treble clef domain in Lysine-Specific Histone Demethylase 1b (PDBid 4FWE\_A1,2)

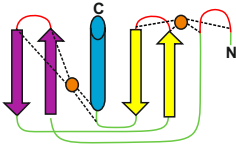

Bacteriophage λ Ea8.5-like treble clef (PDBid 2M7A\_A)

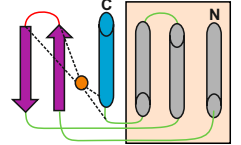

Homeodomain

RBP10 (PDBid 1I3Q\_J)

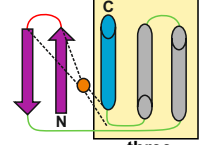

three helical bundle

Zinc finger region of E6 oncoprotein TC\_2 (PDBid 4GIZ\_C2)

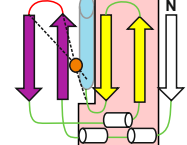

lambda cro repressor fold

Hypothetical protein ORF126 (PDBid 2X5R\_A)

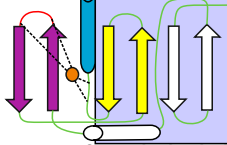

C-terminal sub-domain of ATP-grasp fold

*T. thermophilus* prolyl tRNA synthetase treble clef (PDBid 1H4Q\_A)

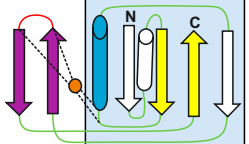

IF3-like fold

Zinc-binding site in N-terminal domain of CasA/Cse1 subunit of *E. coli* CRISPR (PDBid 4TVX\_I)

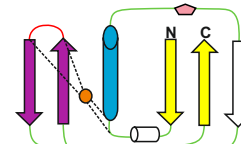

large insertion; mostly random coils with few SSEs

Dimerization domain in the Fur family (PDBid 2FE3\_A)

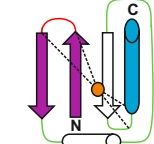

SAP30-like treble clef (PDBid 2KDP\_A)

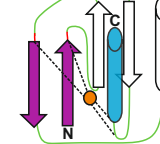

PARP-like treble clef (PDBid 3OD8\_A)

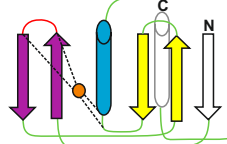

Supplement: srep32070-s1.pdf [file srep32070-s1.pdf]
